# Supplementary material for: Changes in Nucleolin Expression during Malignant Transformation Leading to Ovarian High-Grade Serous Carcinoma
Source: MDPI journal article supplement (doi:10.3390/cancers15030661), 2023-01-21

**Supplementary Figure S1. Uncropped**  
**& unedited Western blots**

**Figure 2A –Nucleolin**

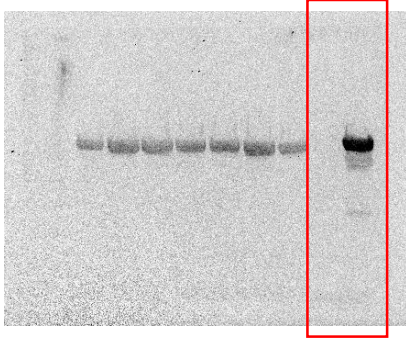

**Figure 2B –Nucleolin**

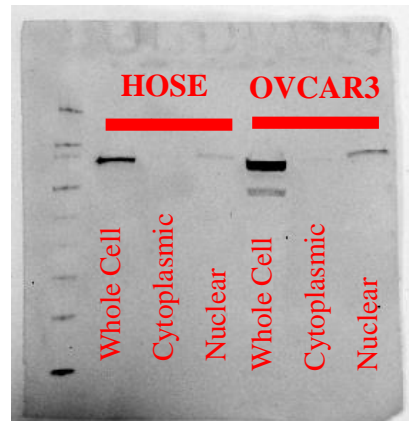

**Figure 6A - Nucleolin**

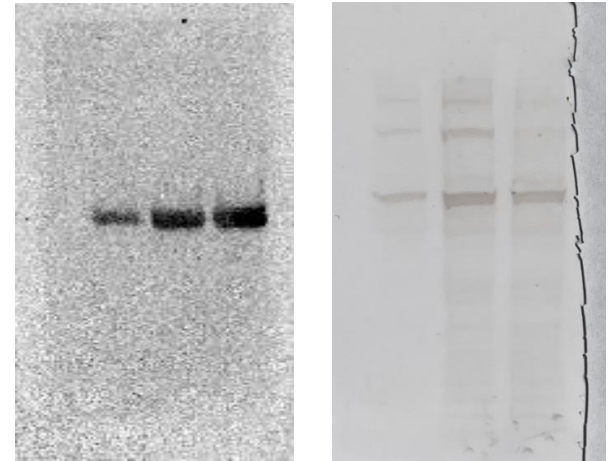

**Fimbria**

**Ovary**

**Figure 2A – Actin**

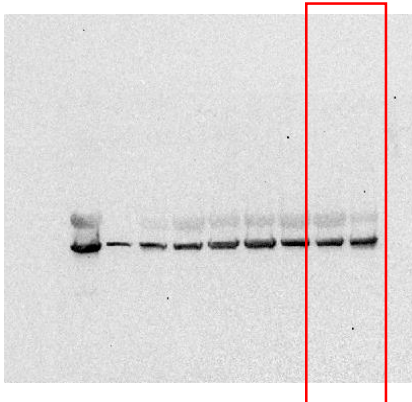

**Figure 2B – PCNA**

**Upper:**

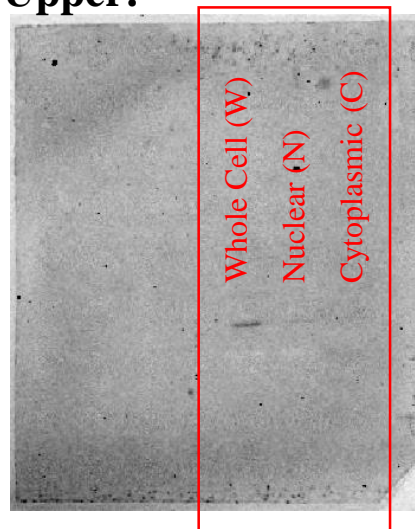

**Bottom:**

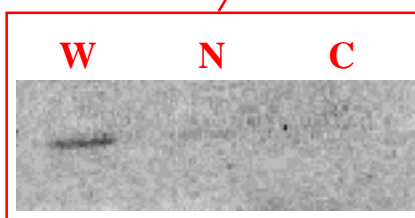

**Figure 6A - Actin**

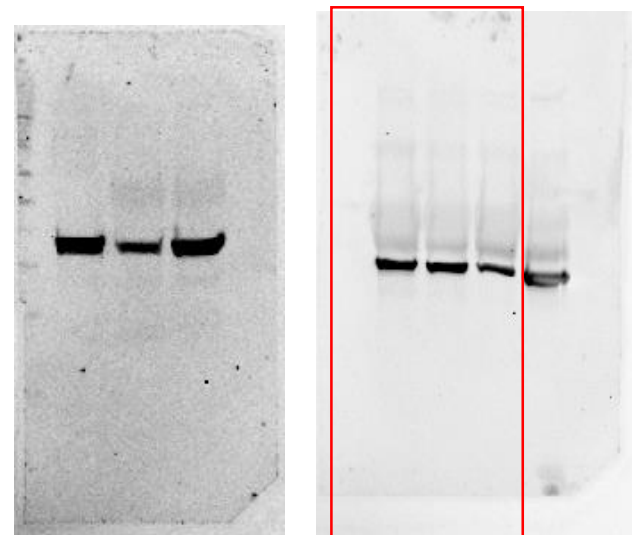

**Fimbria**

**Ovary**

## Supplementary Figure S2. Intensity ratios of Western blot signals.

**A)**

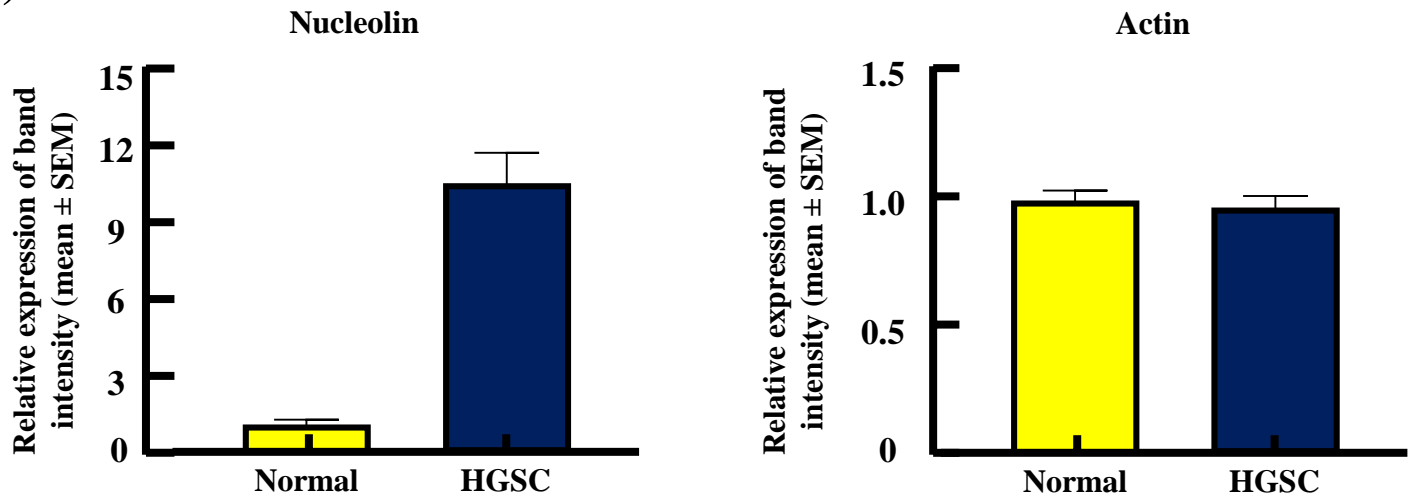

**B)**

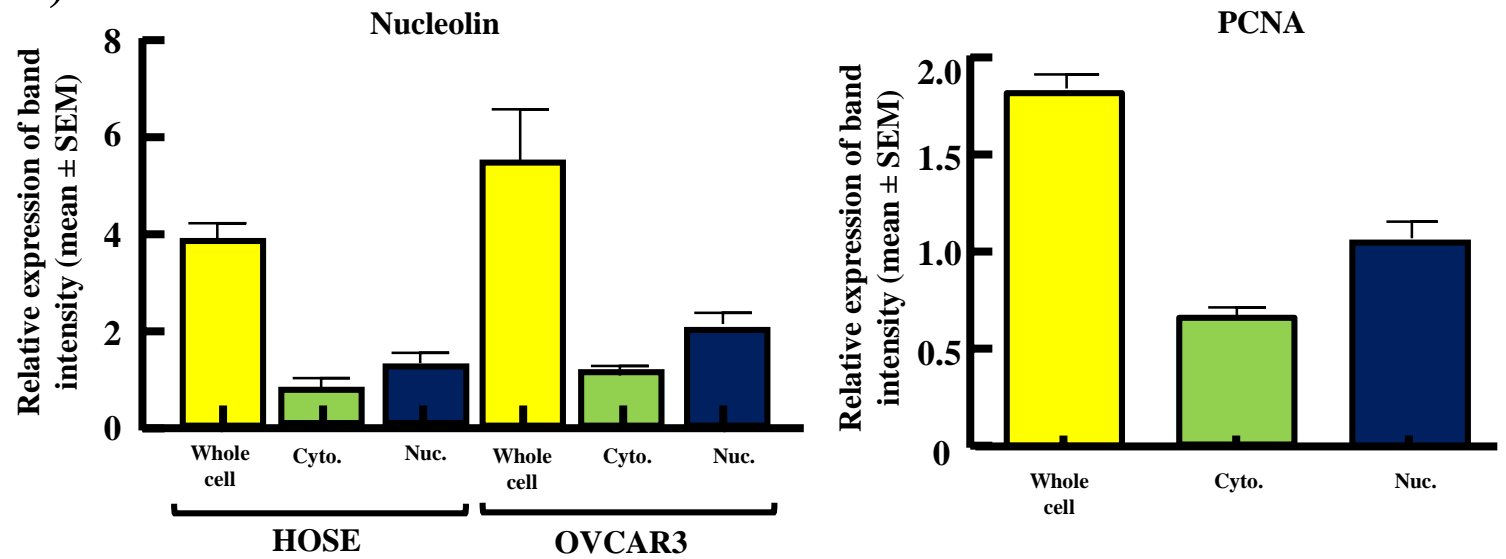

**C)**

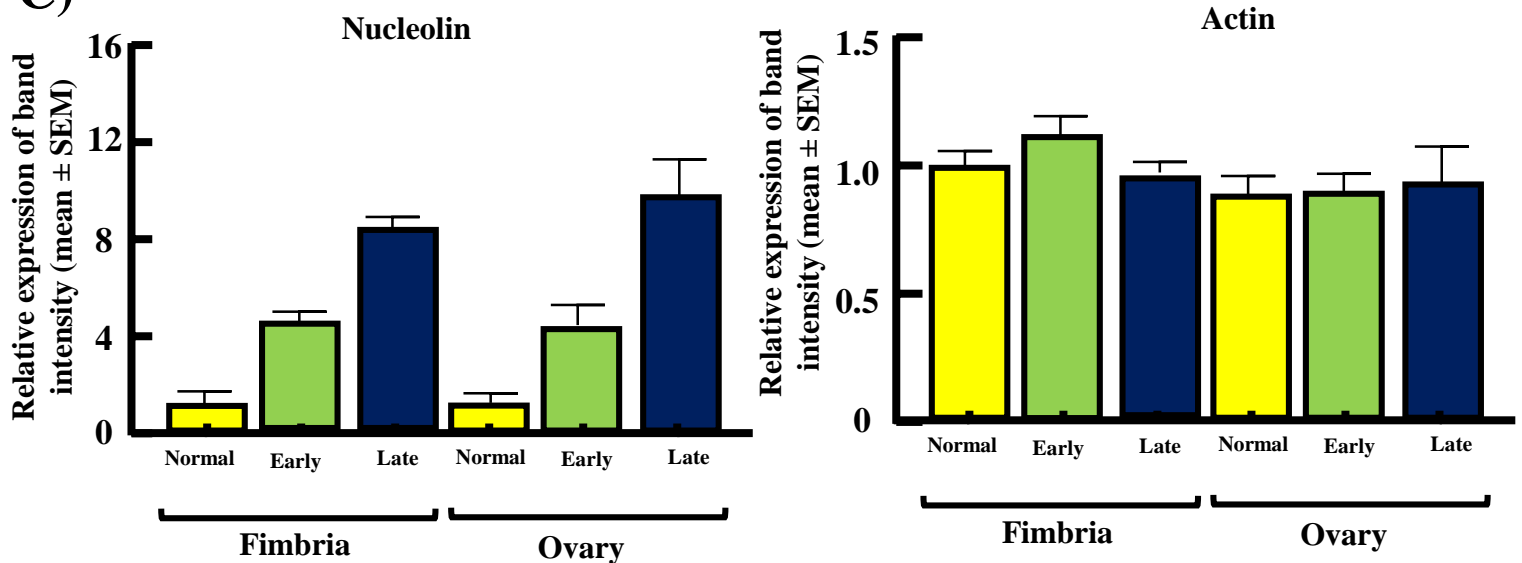

**Supplementary Figure S3.**  
**Immunostaining of Collagen VI, a**  
**stromal cell marker**

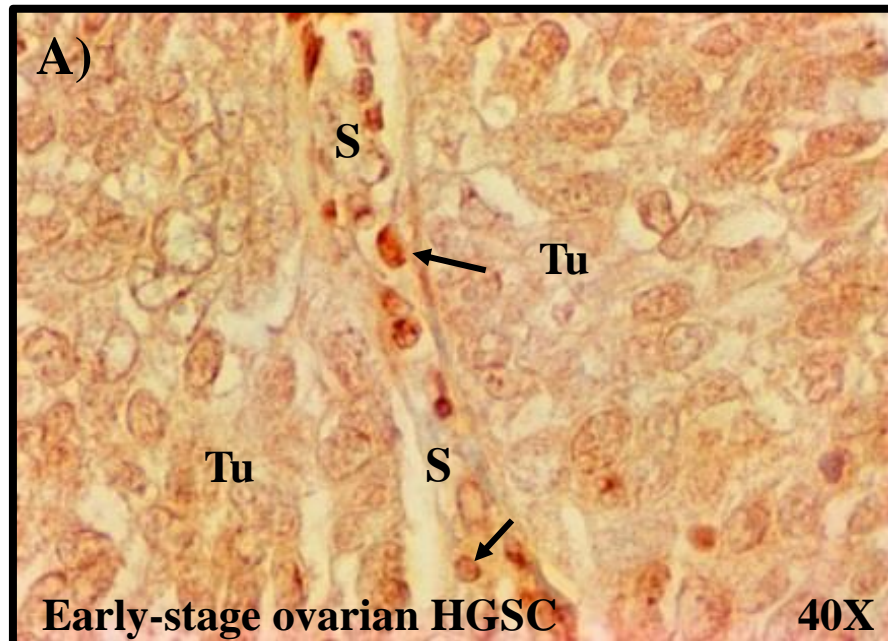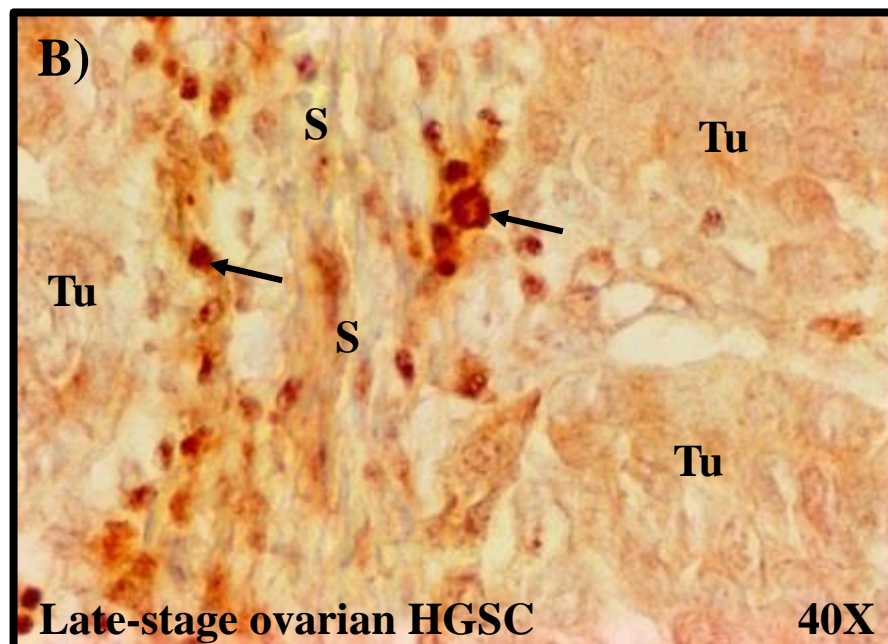

**Supplementary Figure S4. Uncropped**  
**& unedited PCR gels**

**Figure 2C**

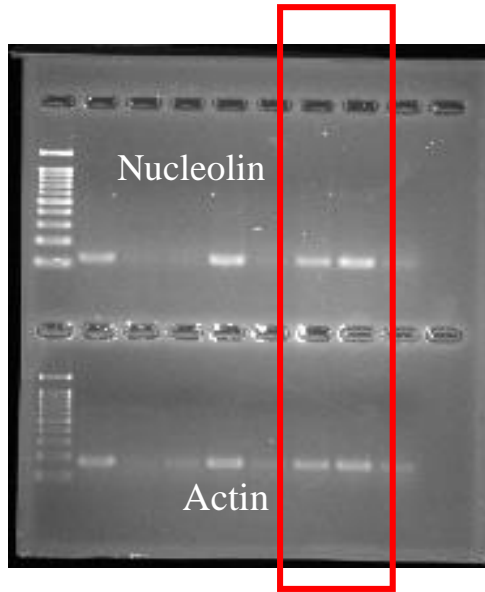

**Figure 6B -  
Fimbria**

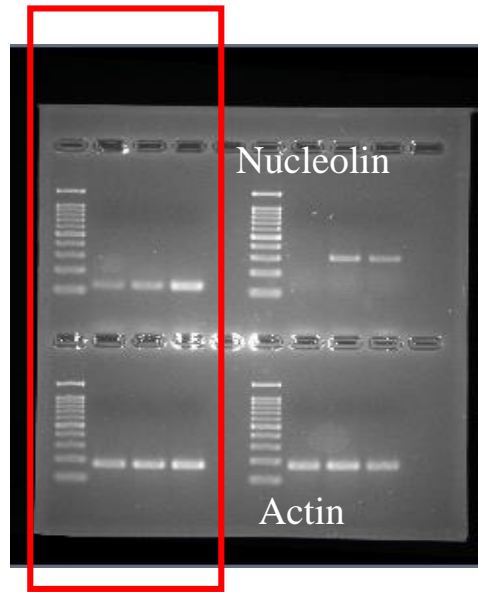

**Figure 6B –  
Ovary**

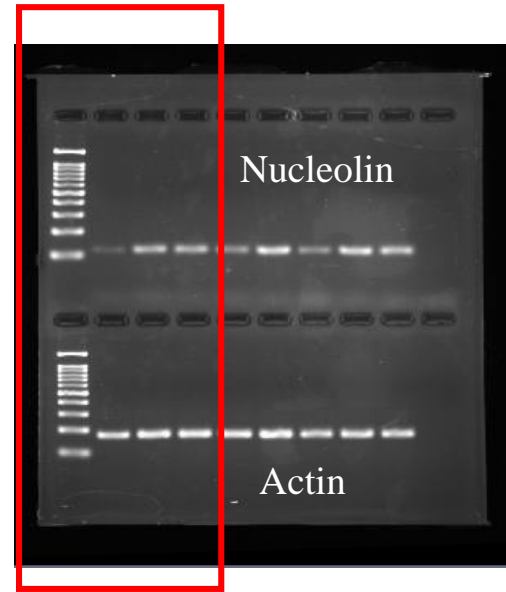

Supplement: s1 [file s1]
